# Supplementary material for: Exposure of Escherichia coli to cadmium telluride quantum dots, silver nanoparticles or cupric oxide nanoparticles during aerobic respiratory versus anaerobic fermentative growth on d-(+)-glucose
Source: Royal Society of Chemistry journal article supplement (doi:10.1039/d2en00403h), 2022-01-01
Supplement: d2en00403h1.pdf [file d2en00403h1.pdf]

## **Supplementary Material**

**Exposure of *Escherichia coli* to cadmium telluride quantum dots, silver or cupric oxide nanoparticles during aerobic respiratory *versus* anaerobic fermentative growth on D-(+)-glucose**

*Joanne Vassallo, Rich Boden and Richard D. Handy*

**Supplementary Information.** Complete and partial (mixed-acid fermentation) oxidation of D-(+)-glucose in *Escherichia coli* K-12 MG1655.

The change in Gibbs energy ( $\Delta G^\circ$ ) for the complete oxidation of glucose is presented in Eq. (1):

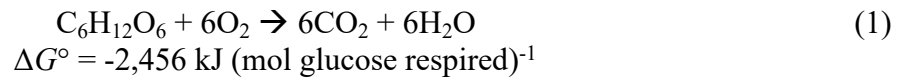

The change in Gibbs energy for the partial (mixed-acid fermentation) of glucose is described in Eq.(2):

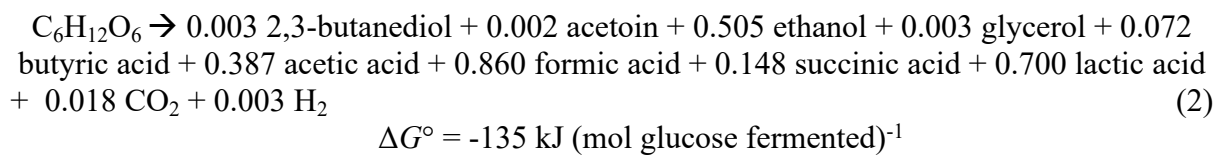

This was determined *de novo* from the standard Gibbs energy of formation ( $\Delta G_f$ ) values.<sup>1-3</sup> Mixed acid fermentation product ratios are for *E. coli* K-12 MG1655 fermenting glucose at starting pH > 7.0.<sup>4</sup>

Using the methodology of Kelly<sup>5</sup> for approximating the maxima for ATP synthesis, based purely on thermodynamics and not on biological ATP yields, possible on the basis of the above Gibbs energy changes and taking that for the formation of ATP as determined *de novo* from  $\Delta G_f$  values obtained,<sup>1, 6, 7</sup> resulting in Eq. (3):

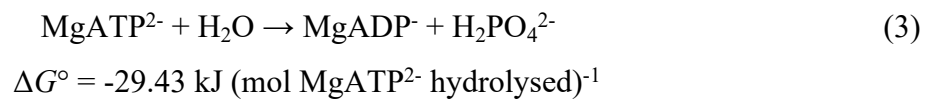

MgATP<sup>2-</sup> is the dominant form of ATP in the living cell (> 80 %).<sup>8</sup>

From the above data, glucose oxidation can yield a thermodynamic maximum of 68.1 ATP/glucose (i.e., -2456 kJ/29.43 kJ mol<sup>-1</sup>) and fermentation 3.8 ATP/glucose (i.e., -135 kJ/29.43 kJ mol<sup>-1</sup>), which is an enormous difference. Given the biosynthetic cost of assimilation of glucose into biomass (C<sub>12</sub>H<sub>24</sub>O<sub>6</sub>N<sub>3</sub> = 306 g) is 31 mol ATP *per* mol biomass,<sup>9</sup> biomass yields during fermentation are much lower.

The maintenance coefficient ( $m_s$ ) is a measure of the cost of the existence of a cell,<sup>10</sup> in terms of how much substrate must be oxidised to provide the energy needed for survival. This

does not include costs of cell division, turnover of cell material, maintaining concentration gradients, motility, and repairing damage. It is expressed in the amount of substrate required to maintain 1 g of biomass for 1 h. It has been studied in various forms from the 1940s and is well-established in microbial physiology as a measure of the ‘cost of living’.

As  $m_S$  can only be determined from continuous-flow cultures grown in the chemostat,<sup>10</sup> we cannot express our data herein in terms of it, but it is a useful parameter for consideration of the effect of nanomaterials on *E. coli* K-12 MG1655 grown under each condition. Typical  $m_S$  values for organisms growing aerobically on glucose are in the region of 0.05 - 0.1 mmol glucose (g dry biomass)<sup>-1</sup> h<sup>-1</sup>, whereas during fermentation they can rise to as much as 2 - 4 mmol glucose (g dry biomass)<sup>-1</sup> h<sup>-1</sup>.<sup>11-13</sup>

**Supplemental Fig. S1** *Escherichia coli* K-12 MG1655 mixed-acid fermentation pathway as adapted from Stanier et al.<sup>14</sup> and Clark.<sup>15</sup> For figure clarity, the protons (H<sup>+</sup>) are presented on the acidic products acetate, formate, succinate, lactate and pyruvate (fermentation products).

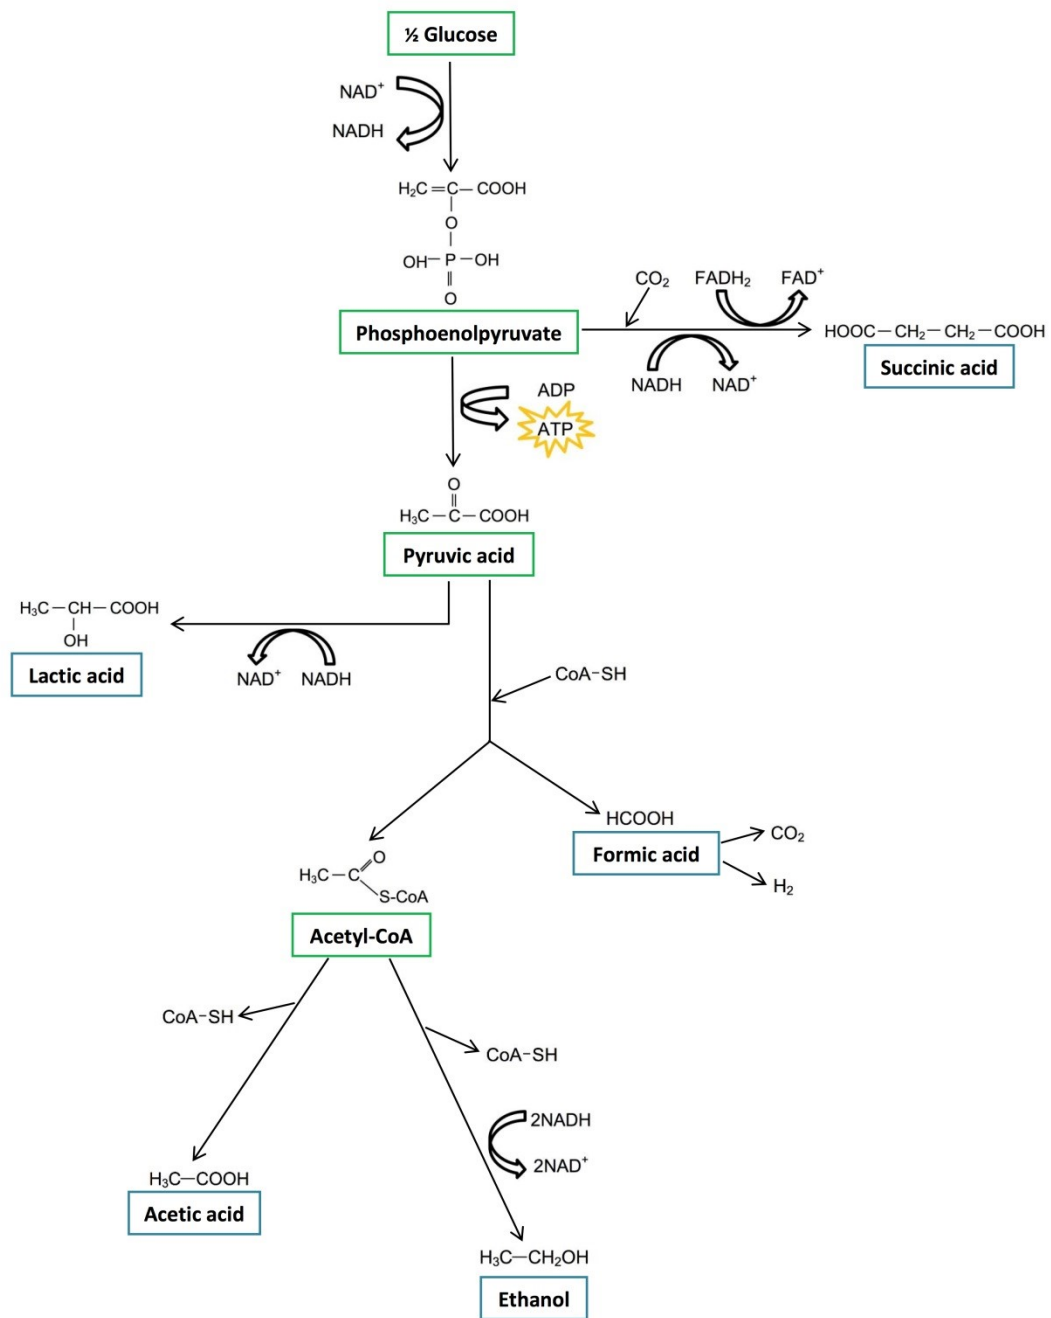

**Supplemental Fig. S2** Growth curve analysis for *E. coli* K-12 MG1655 incubated under oxic conditions in 250 ml Erlenmeyer flasks ( $n = 3$ ) and anoxic conditions in 120 ml sealed serum bottles ( $n = 3$ ), with measured mean  $\pm$  S.E.M absolute biomass (mg dry weight  $l^{-1}$ ) on the  $y$ -axis, against time in hours on the  $x$ -axis.

### ***E. coli* K-12 MG1655 growth kinetics**

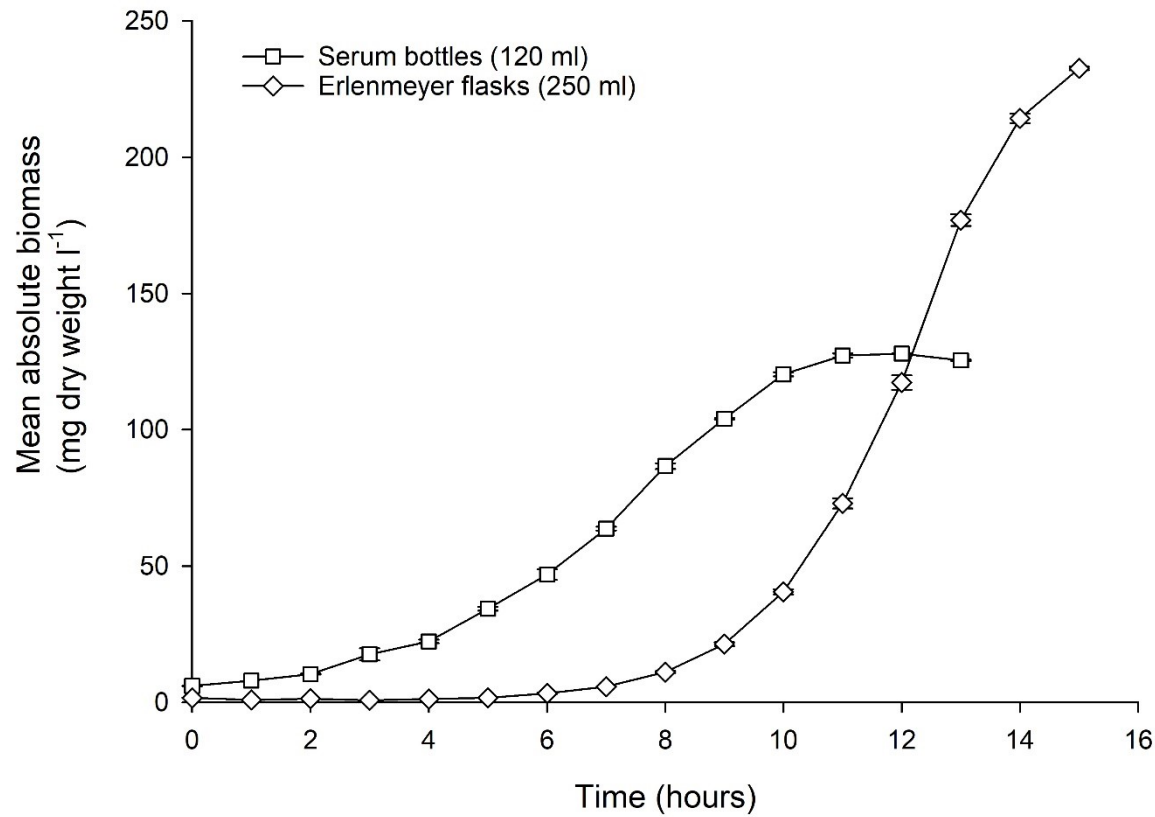

**Supplemental Fig. S3** Micro-elemental composition of *E. coli* K-12 MG1655 incubated under: a) oxic conditions, b) anoxic conditions ( $n = 3$ ); data are presented as mean  $\pm$  S.E.M, for carbon (C), hydrogen (H), oxygen (O), nitrogen (N), sulfur (S) and other elemental percentage composition (%), as analysed from 3 replicate dried pellets of bacterial biomass, and with two technical replicates analysed for each elemental assay.

(a)  
a)

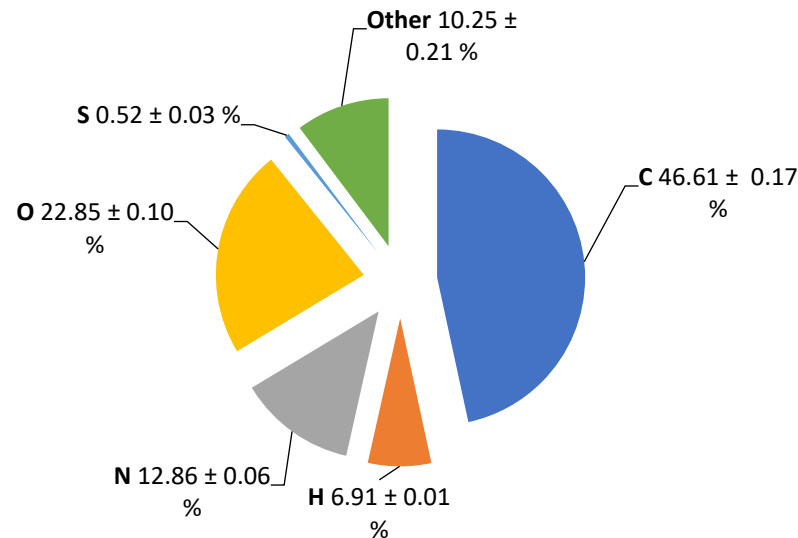

b)

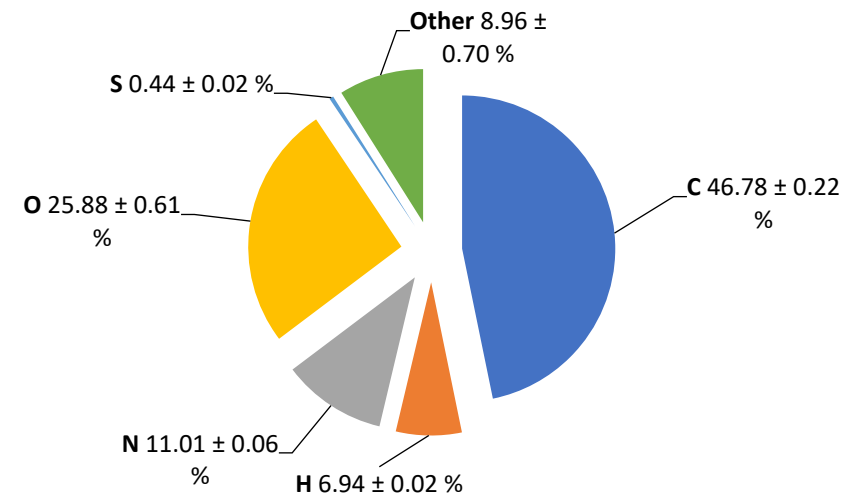

**Supplemental Fig. S4** Total measured metal concentration in the supernatant (post-bacterial exposure) relative to the initial pre-exposure calculated total metal concentration, as dosed in the NaCl-EBS medium. Data are presented as percentage mean values  $\pm$  S.E.M ( $n = 3$ ); where a) silver, b) copper, c) cadmium and d) tellurium. Different letters indicate significant differences by test material type (ANOVA,  $p < 0.05$ ), in oxic

and anoxic conditions, respectively. Significant differences by test material type ( $t$ -test,  $p < 0.05$ ) between oxic and anoxic conditions are represented by an asterisk (\*).

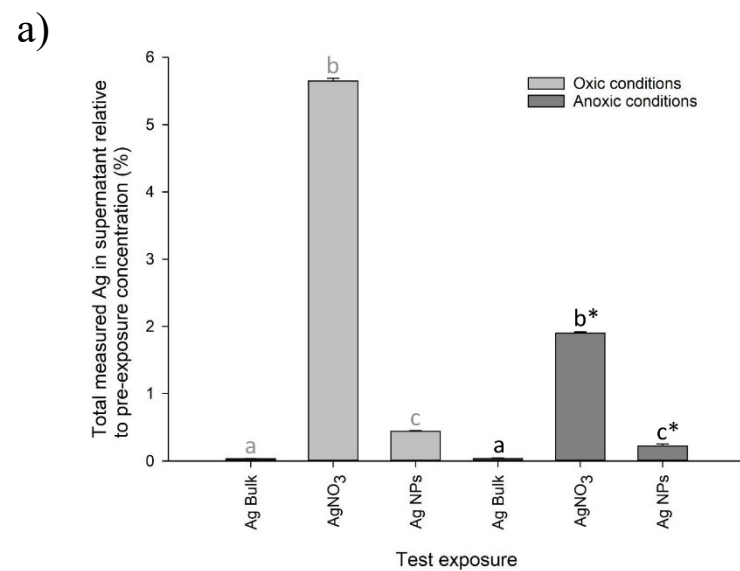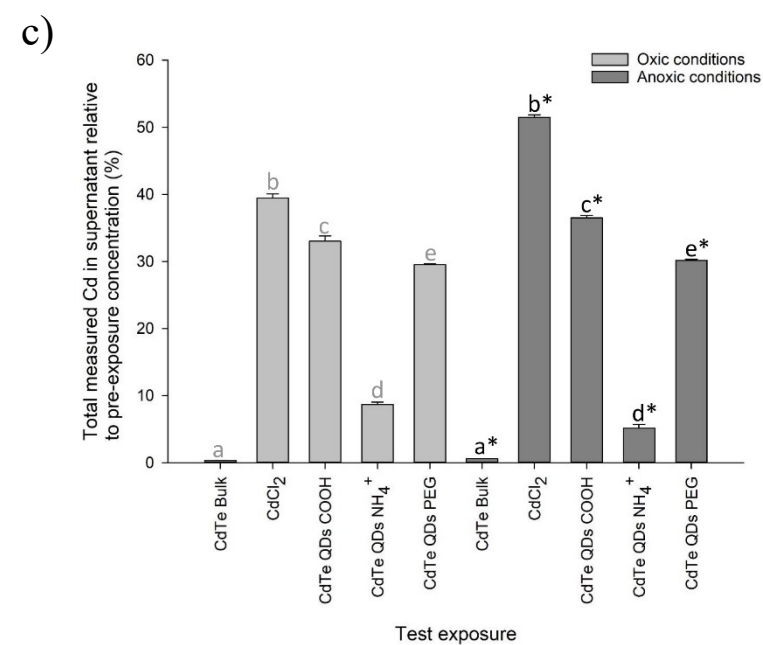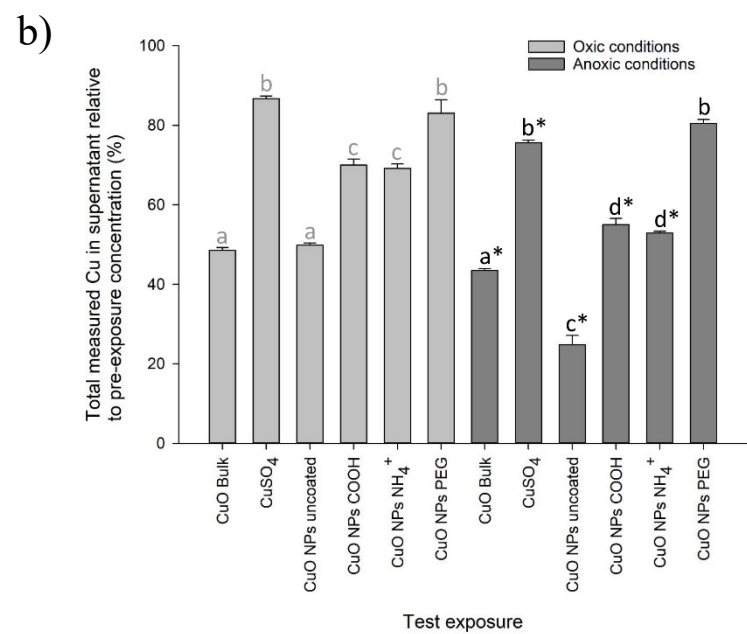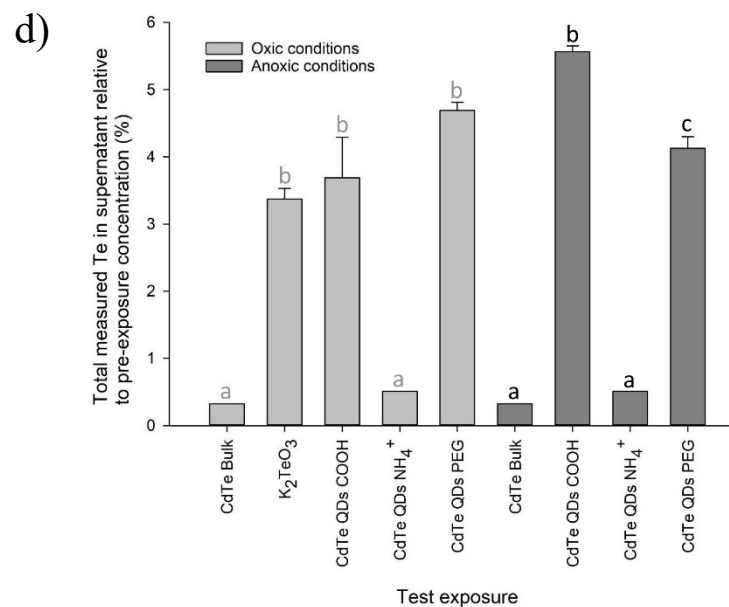

## References:

1. R. A. Alberty, *Thermodynamics of Biochemical Reactions*, John Wiley & Sons, New Jersey, 2003.
2. Z. Galus, in *Standard Potentials in Aqueous Solutions*, CRC Press, London, 1985.
3. P. N. Ross, in *Standard Potentials in Aqueous Solutions*, CRC Press, London, 1985.
4. A. C. Blackwood, G. A. Ledingham and A. C. Neish, Dissimilation of glucose at controlled pH values by pigmented and non-pigmented strains of *Escherichia coli*, *J Bacteriol*, 1956, **72**, 497-499.
5. D. P. Kelly, in *Companion to Microbiology*, Longman, London, 1979.
6. K. S. V. Santhanam, in *Standard Potentials in Aqueous Solutions*, CRC Press, London, 1985.
7. J. P. Hoare, in *Standard Potentials in Aqueous Solutions*, CRC Press, London, 1985.
8. A. C. Storer and A. Cornish-Bowden, Concentration of  $\text{MgATP}^{2-}$  and other ions in solution. Calculation of the true concentrations of species present in mixtures of associating ions, *Biochemical Journal*, 1976, **159**, 1-5.
9. C. Anthony, *The Biochemistry of Methyloprophs*, Academic Press London, 1982.
10. R. Boden and L. Hutt, in *Consequences of Microbial Interactions with Hydrocarbons, Oils, and Lipids: Biodegradation and Bioremediation, Handbook of Hydrocarbon and Lipid Microbiology*, Springer Nature, Switzerland, 2018, DOI: 10.1007/978-3-319-44535-9\_24-1, pp. 1-42.
11. S. J. Pirt, The maintenance energy of bacteria in growing cultures, *Proceedings of the Royal Society of London*, 1965, **163**, 224-231.
12. S. J. Pirt, *Principles of Microbe and Cell Cultivation*, Blackwell, London, 1975.
13. J. Monod, *Recherches sur la croissance bactériennes*, Masson, Paris, 1942.
14. R. Y. Stanier, Adelberg, E. A., Ingraham, J. L., *General Microbiology*, Macmillan, London, 1977.
15. D. P. Clark, The fermentation pathways of *Escherichia coli*, *FEMS Microbiology Reviews*, 1989, **5**, 223-234.
